# Supplementary material
Source: Royal Society of Chemistry journal article supplement (doi:10.1039/d6nj00244g)
Supplement: d6nj00244g1.pdf [file d6nj00244g1.pdf]

# **Preparation of microwave-assisted expired honey derived electrodes with excellent performance for supercapacitors**

Xinting Yu<sup>†a</sup>, Yuxin Zhu<sup>†b</sup>, Yunqiang Zhang<sup>\*b</sup>, Mei Li<sup>\*b</sup>

a Department of Science and Engineering Education, Shandong Open University,

Jinan 250002, China

b School of Materials Science and Engineering, Qilu University of Technology

(Shandong Academy of Sciences), Jinan, 250353, China.

\*Corresponding authors: Yunqiang Zhang(yun\_zhang@qlu.edu.cn); Mei Li  
(lim@qlu.edu.cn);

## Figures

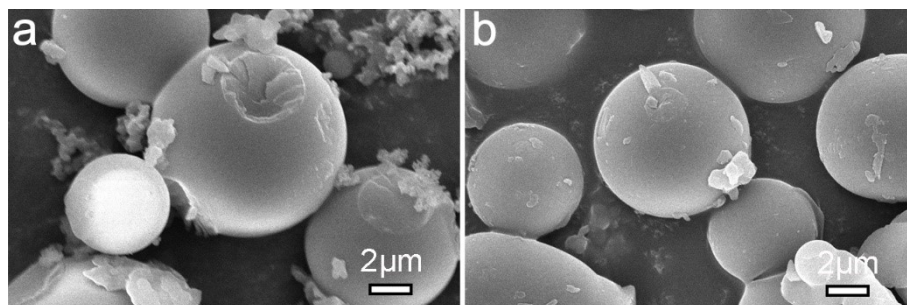

**Fig. S1.** SEM images of CHC and CMC samples before carbonization: (a) BH, (b) BM.

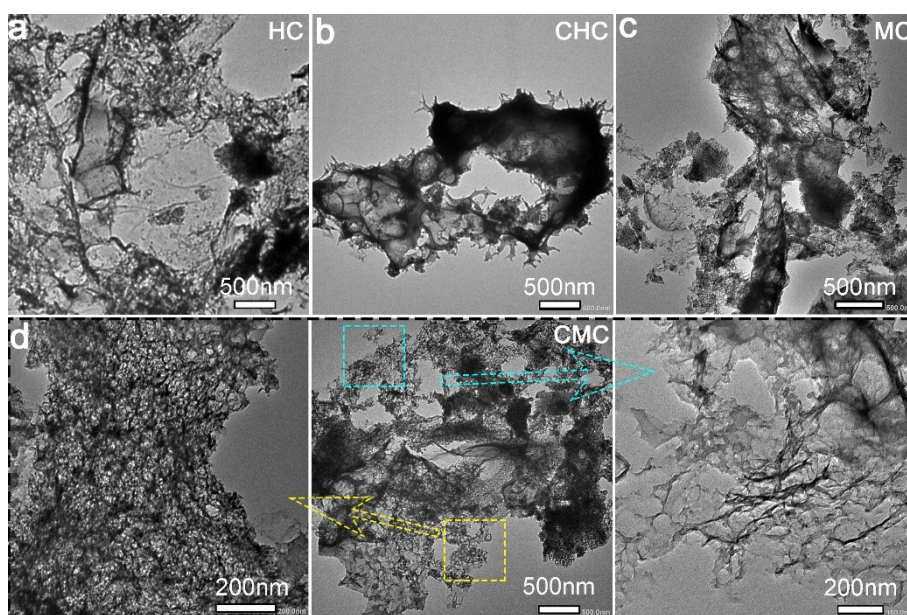

**Fig. S2.** TEM images in different magnification: (a) HC, (b) CHC, (c) MC, (d) CMC.

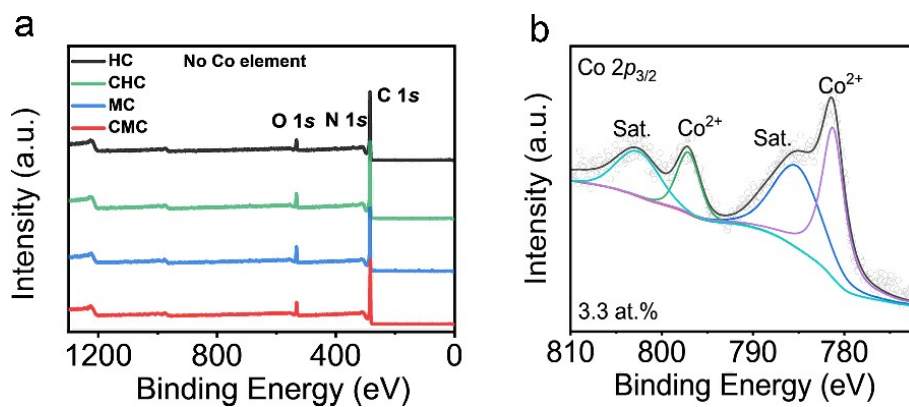

**Fig. S3.** (a) XPS survey spectrum of HC, CHC, MC and CMC. (b) Co 2p of

intermediate product after carbonization but before acid washing.

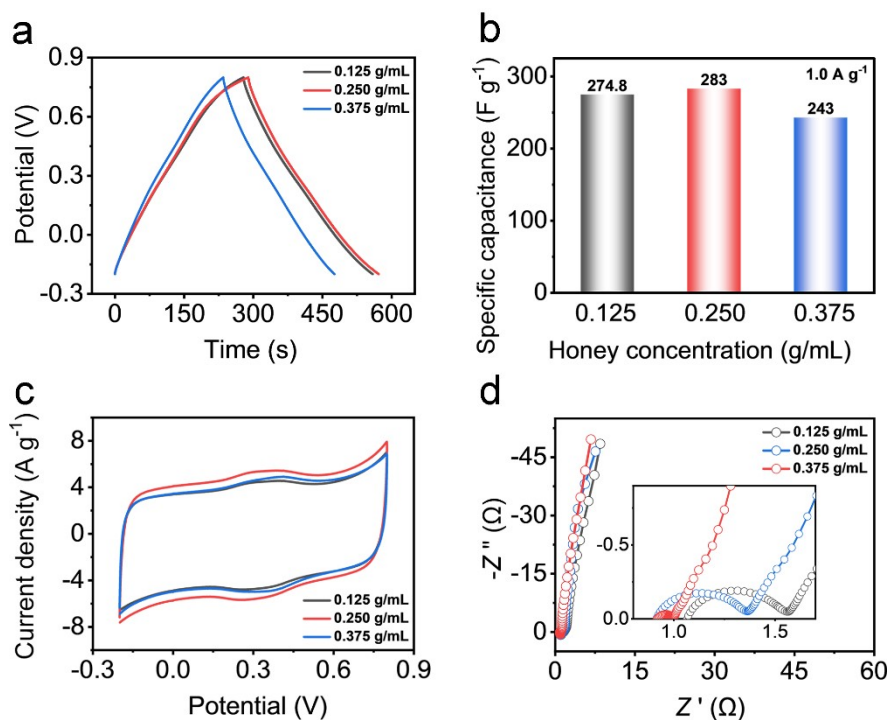

**Fig. S4.** Electrochemical performance of samples with different honey concentration under hydrothermal conditions: (a) GCD curves at  $1.0 \text{ A g}^{-1}$ , (b) the  $C_{sp}$  values at  $1.0 \text{ A g}^{-1}$ , (c) CV curves at  $10 \text{ mV s}^{-1}$ , (d) Nyquist plots.

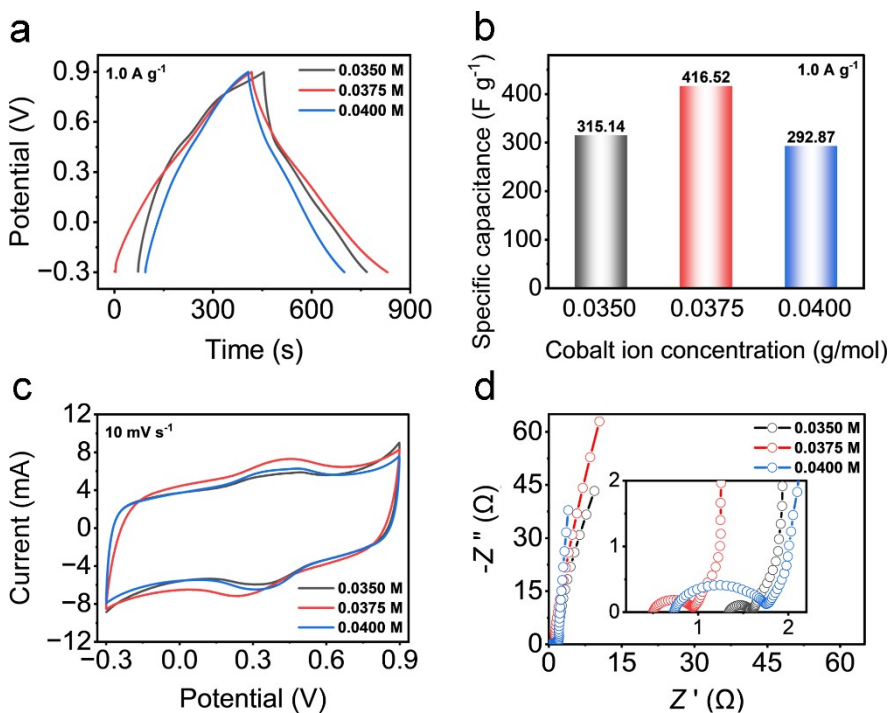

**Fig. S5** Electrochemical performance of samples with different cobalt ion concentration under hydrothermal conditions: (a) GCD curves at  $1.0 \text{ A g}^{-1}$ , (b) the  $C_{sp}$

values at  $1.0 \text{ A g}^{-1}$ , (c) CV curves at  $10 \text{ mV s}^{-1}$ , (d) Nyquist plots.

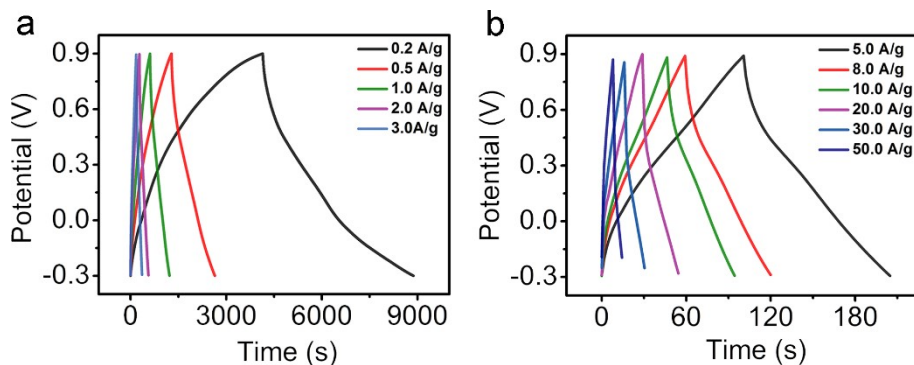

**Fig. S6** GCD curves of CMC at (a)  $0.2\sim 3.0 \text{ A g}^{-1}$ , (b)  $5.0\sim 50.0 \text{ A g}^{-1}$ .

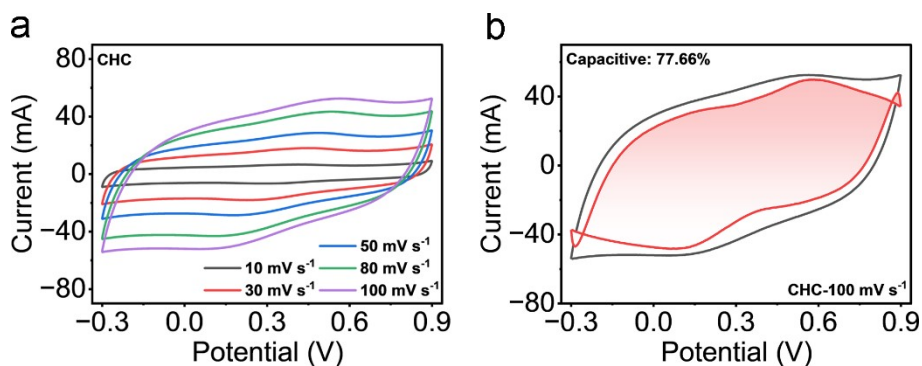

**Fig. S7** CV curves at different scan rates of (a) CMC, (b) CHC and (c) pseudo-capacitance contribution of CHC at  $100 \text{ mV s}^{-1}$ .

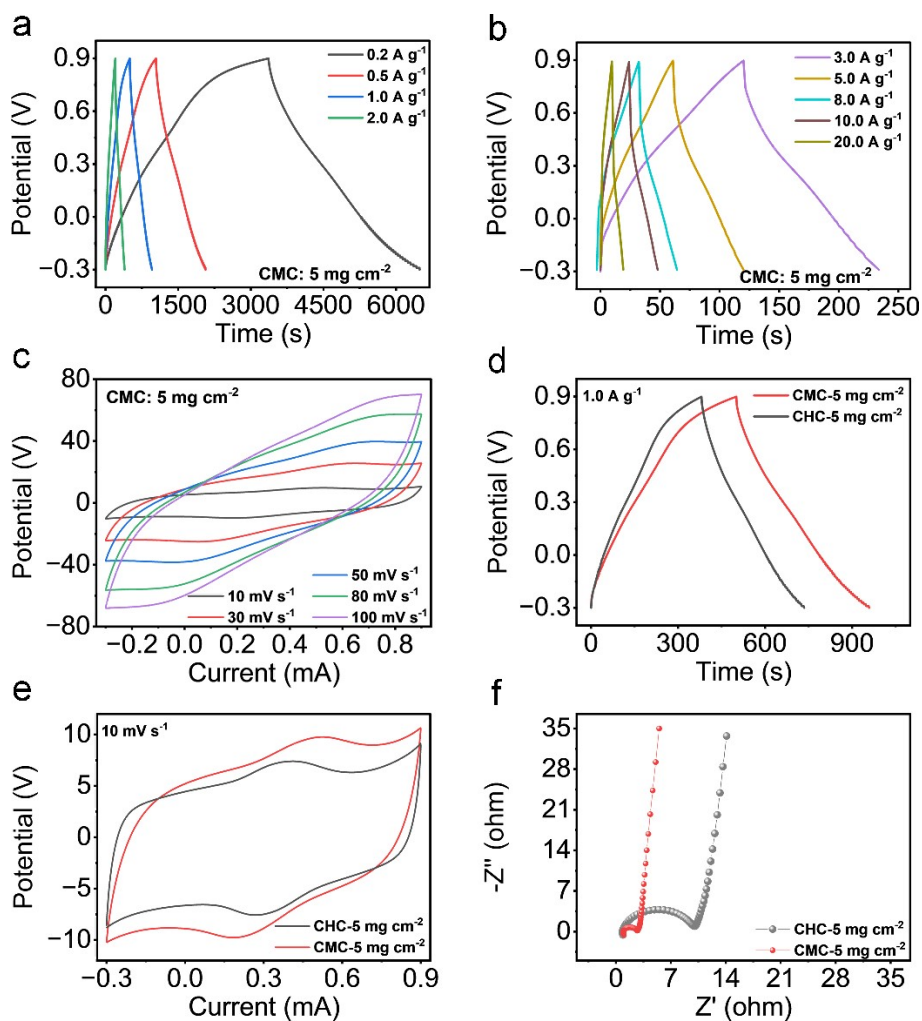

**Fig.S8** GCD curves of CMC at the loading of  $5 \text{ mg cm}^{-2}$  under (a)  $0.2\sim 2.0 \text{ A g}^{-1}$ , (b)  $3.0\sim 20.0 \text{ A g}^{-1}$ , (c) CV curves at different scan rates, (d) GCD curves, (e) CV curves at  $10 \text{ mV s}^{-1}$ , (f) Nyquist plots of CMC and CHC.

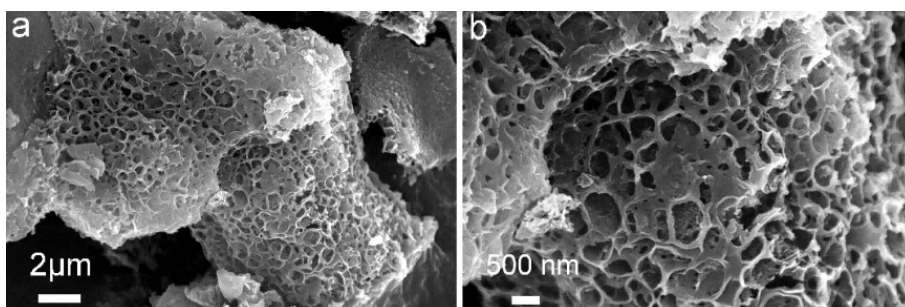

**Fig. S9** SEM images of CMC after 15,000 charge-discharge cycles.

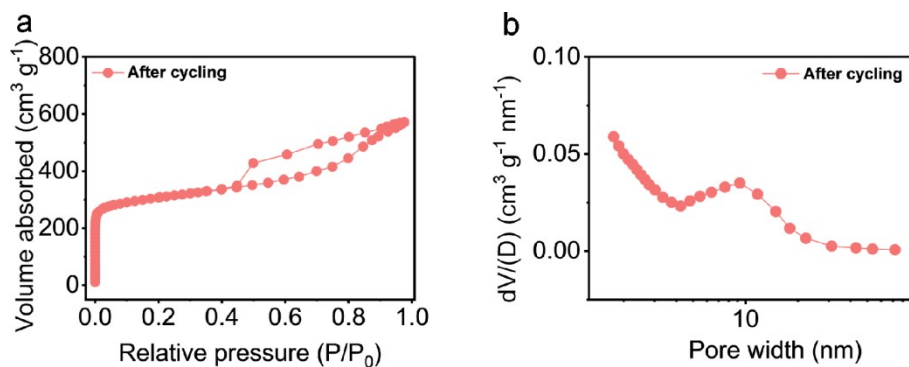

**Fig. S10** Pore structural analysis of CMC after 15,000 charge-discharge cycles: (a)  $N_2$  adsorption and desorption isotherms, (b) the corresponding pore size distributions.

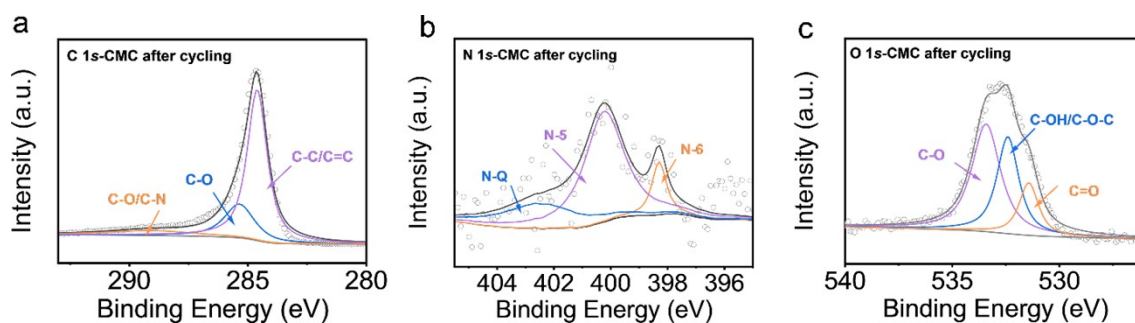

**Fig. S11** High-resolution XPS scans for (a) C 1s, (b) N 1s and (c) O 1s of CMC after 15,000 charge-discharge cycles.

## Tables

**Table S1.** Surface area and pore structure of HC, CHC, MC and CMC.

| Samples | $S_{\text{BET}}^a$<br>( $\text{m}^2 \text{g}^{-1}$ ) | $S_{\text{micro}}^b$<br>( $\text{m}^2 \text{g}^{-1}$ ) | $S_{\text{meso}}^c$<br>( $\text{m}^2 \text{g}^{-1}$ ) | $V_{\text{tot}}^d$<br>( $\text{cm}^3 \text{g}^{-1}$ ) | $V_{\text{micro}}^e$<br>( $\text{cm}^3 \text{g}^{-1}$ ) | Average<br>pore size<br>(nm) |
|---------|------------------------------------------------------|--------------------------------------------------------|-------------------------------------------------------|-------------------------------------------------------|---------------------------------------------------------|------------------------------|
| HC      | 420.5                                                | 405.9                                                  | 14.5                                                  | 0.186                                                 | 0.164                                                   | 1.77                         |
| CHC     | 451.2                                                | 439.8                                                  | 11.4                                                  | 0.194                                                 | 0.177                                                   | 1.72                         |
| MC      | 1154.5                                               | 840.0                                                  | 314.2                                                 | 0.886                                                 | 0.340                                                   | 3.07                         |
| CMC     | 1404.6                                               | 1011.3                                                 | 393.3                                                 | 1.081                                                 | 0.408                                                   | 3.08                         |

<sup>a</sup> The total surface area per unit mass or volume of as-prepared samples.

<sup>b</sup> The total surface area of micropores (pores with diameters less than 2 nanometers) per unit mass within a porous material.

<sup>c</sup> The total surface area occupied by mesopores (pores with diameters between 2 and 50 nanometers) per unit mass within a porous material.

<sup>d</sup> Total volume of all pores within a unit mass of material.

<sup>e</sup> The total volume occupied by micropores (pores smaller than 2 nanometers in diameter) per unit mass in porous materials.

**Table S2.** Elemental atomic ratio of samples.

| Samples | Molar ratio of Co (wt%) |
|---------|-------------------------|
| CMC     | 0.03                    |

**Table S3.** Elemental atomic ratio of samples.

| Samples | C (at%) | N (at%) | O (at%) |
|---------|---------|---------|---------|
| HC      | 90.71   | 1.38    | 7.91    |
| CHC     | 90.78   | 0.51    | 8.71    |
| MC      | 88.08   | 1.66    | 10.25   |
| CMC     | 88.97   | 1.33    | 9.71    |

**Table S4.** Peak information points in detail of as-prepared samples.

| Samples      | HC            |                       | CHC           |                       | MC            |                    | CMC           |                       |
|--------------|---------------|-----------------------|---------------|-----------------------|---------------|--------------------|---------------|-----------------------|
|              | Peaks<br>(eV) | Proportio<br>n (at.%) | Peaks<br>(eV) | Proportio<br>n (at.%) | Peaks<br>(eV) | Proport<br>ion (%) | Peaks<br>(eV) | Proportio<br>n (at.%) |
| <b>C1s</b>   |               |                       |               |                       |               |                    |               |                       |
| C-N/C-O      | 287.8         | <b>21.18</b>          | 287.8         | <b>19.67</b>          | 287.8         | <b>18.78</b>       | 287.8         | <b>14.31</b>          |
| C=O          | 285.2         | <b>38.01</b>          | 285.1         | <b>29.53</b>          | 285.2         | <b>39.82</b>       | 285.1         | <b>30.59</b>          |
| C-C/C=C      | 284.5         | <b>40.81</b>          | 284.6         | <b>50.80</b>          | 284.7         | <b>41.40</b>       | 284.6         | <b>55.10</b>          |
| <b>N1s</b>   |               |                       |               |                       |               |                    |               |                       |
| N-Q          | 401.9         | <b>35.01</b>          | 401.9         | <b>60.15</b>          | 401.9         | <b>29.65</b>       | 401.9         | <b>64.88</b>          |
| N-5          | 400.1         | <b>42.79</b>          | 400.1         | <b>30.60</b>          | 400.3         | <b>55.07</b>       | 400.1         | <b>22.58</b>          |
| N-6          | 398.5         | <b>22.20</b>          | 398.6         | <b>9.25</b>           | 399           | <b>15.28</b>       | 398.6         | <b>12.54</b>          |
| <b>O1s</b>   |               |                       |               |                       |               |                    |               |                       |
| C-O-C        | 533.1         | <b>81.01</b>          | 533.2         | <b>60.25</b>          | 533.2         | <b>31.08</b>       | 533.1         | <b>70.71</b>          |
| C-O/C-<br>OH | 532.3         | <b>12.03</b>          | 532.4         | <b>24.07</b>          | 532.3         | <b>42.40</b>       | 532.4         | <b>14.49</b>          |
| C=O          | 531.4         | <b>6.96</b>           | 531.4         | <b>15.68</b>          | 531.4         | <b>26.52</b>       | 531.4         | <b>14.80</b>          |

**Table S5.** Comparison of the electrochemical performance between the honey biochar prepared in this work and other biochar-based electrodes from the literature.

| biochar materials                       | $C_{sp}$<br>(F g <sup>-1</sup> ) | Cycle<br>Stability (%) | Ref.      |
|-----------------------------------------|----------------------------------|------------------------|-----------|
| Cotton and catkin                       | 367                              | 92, 5000 cycles        | [1]       |
| hemp stems                              | 220                              | 96, 2000 cycles        | [2]       |
| Soybean oi                              | 103                              | 138, 1000 cycles       | [3]       |
| cow-ghee                                | 266                              | 99, 10,000 cycles      | [4]       |
| garlic peel                             | 304 C/g                          | 93, 10,000 cycles      | [5]       |
| loofah sponges                          | 294                              | 93.6, 30,000 cycles    | [6]       |
| corn straw powder                       | 246.2                            | 97.7, 10,000 cycles    | [7]       |
| Polypropylene<br>packaging materials    | 403.67                           | 95, 3,000 cycles       | [8]       |
| tea waste                               | 334                              | 91, 5,000 cycles       | [9]       |
| <i>Ficus altissima</i> branch<br>wastes | 378                              | 78, 5000 cycles        | [10]      |
| Honey                                   | 780.2                            | 96.7, 15,000 cycles    | This work |

**Table S6.** Surface area and pore structure of CMC after 15,000 charge-discharge cycles.

| Samples              | $S_{BET}$<br>(m <sup>2</sup> g <sup>-1</sup> ) | $S_{micro}$<br>(m <sup>2</sup> g <sup>-1</sup> ) | $S_{meso}$<br>(m <sup>2</sup> g <sup>-1</sup> ) | $V_{tot}$<br>(cm <sup>3</sup> g <sup>-1</sup> ) | $V_{micro}$<br>(cm <sup>3</sup> g <sup>-1</sup> ) | Average<br>pore size<br>(nm) |
|----------------------|------------------------------------------------|--------------------------------------------------|-------------------------------------------------|-------------------------------------------------|---------------------------------------------------|------------------------------|
| CMC after<br>cycling | 1296.3                                         | 956.1                                            | 340.2                                           | 0.965                                           | 0.351                                             | 2.80                         |

**Table S7.** Peak information points in detail of CMC after 15,000 charge-discharge cycles.

| Samples                 | CMC after cycling |                   |
|-------------------------|-------------------|-------------------|
|                         | Peaks (eV)        | Proportion (at.%) |
| <b>C1s (90.26 at.%)</b> |                   |                   |
| C-N/C-O                 | 288.8             | 60.97             |
| C=O                     | 285.3             | 20.44             |
| C-C/C=C                 | 284.6             | 8.85              |
| <b>N1s (1.20 at.%)</b>  |                   |                   |
| N-Q                     | 402.7             | 0.84              |
| N-5                     | 400.2             | 0.12              |
| N-6                     | 398.3             | 0.24              |
| <b>O1s (8.54 at.%)</b>  |                   |                   |
| C-O-C                   | 533.4             | 4.22              |
| C-O/C-OH                | 532.4             | 2.92              |
| C=O                     | 531.4             | 1.40              |

References:

- [1] B. Chen, D. Wu, T. Wang, F. Yuan and D. Jia, *Chem. Eng. J.*, 2023, **462**, 142163.
- [2] B. Tekin and Y. Topcu, *J. Energy Storage*, 2024, **77**, 109879.
- [3] C. E. Sánchez-Rodríguez, J. J. Elisea-Espinoza, B. Portillo-Rodríguez and R. López-Sandoval, *Diamond Relat. Mater.*, 2024, **146**, 111213.
- [4] S. Muduli, S. K. Pati and S. K. Martha, *Int. J. Energy Res.*, 2022, **46**, 14074-14087.
- [5] R. J. Wesley, S. Vasanth, A. Durairaj, R. Justinabraham, C. Viswanathan, A. Obadiah and S. Vasanthkumar, *J. Energy Storage*, 2024, **91**, 112092.
- [6] Y. Cheng, M. Chen, K. Xia, H. Li, G. Xu, L. Yang, Z. Zhao, P. Liu and L. Wang, *J. Power Sources*, 2024, **624**, 235523.
- [7] Y. Zhao, H. Hu, F. Wang, Y. Yan, K. Ye, W. Zeng, K. Tang, A. Huang, S. Cai, L. Lan, L. Liu, W. Zhu, Y. Wang, Z. Yan, L. Qiao, W. Tang and M. Yan, *J. Power Sources*, 2025, **629**, 236016.
- [8] S. Sekar, C. D. Venkatachalam, M. Sengottian and S. R. Ravichandran, *J. Energy Storage*, 2024, **104**, 114475.
- [9] R. S. Karmur, D. Gogoi, M. R. Das and N. N. Ghosh, *RSC Adv.*, 2024, **14**, 27465-27474.
- [10] Y. Wang, Y. Liu, X. Huang, G. He and K. Yan, *Chin. Chem. Lett.*, 2024, **35**, 109301.
